# Supplementary material
Source: MDPI journal article supplement (https://www.mdpi.com/2072-4292/9/5/415)
Supplement: s1 [file s1]

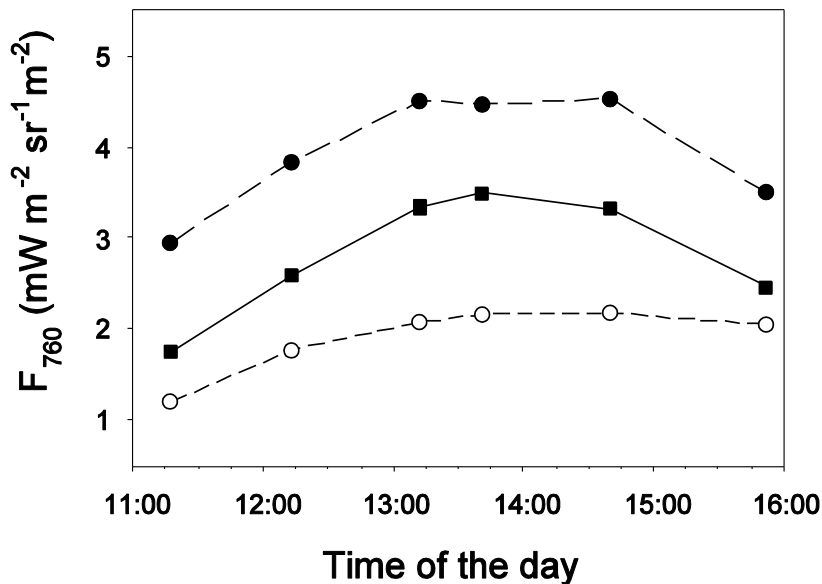

**Figure S1:** Diurnal changes of canopy sun-induced chlorophyll fluorescence measured at 760 nm ( $F_{760}$ ) in sugar beet. Each data point represents the median  $F_{760}$  at each measuring time for: all vegetation pixels including sunlit and shaded surfaces (closed squares), vegetation pixels classified as class 1 (closed circles), vegetation pixels classified as class 2 (open circles). The data was collected over a single day.
